# Supplementary material for: Physiological and molecular responses to drought in Petunia: the importance of stress severity
Source: PubMed Central journal article supplement — J Exp Bot. 2012 Oct 17;63(18):6335–45. doi: 10.1093/jxb/ers285 (PMC3504489; doi:10.1093/jxb/ers285), 2012-10-17
Supplement: supp_ers285_jexbot080549_file001.pdf [file supp_ers285_jexbot080549_file001.pdf]

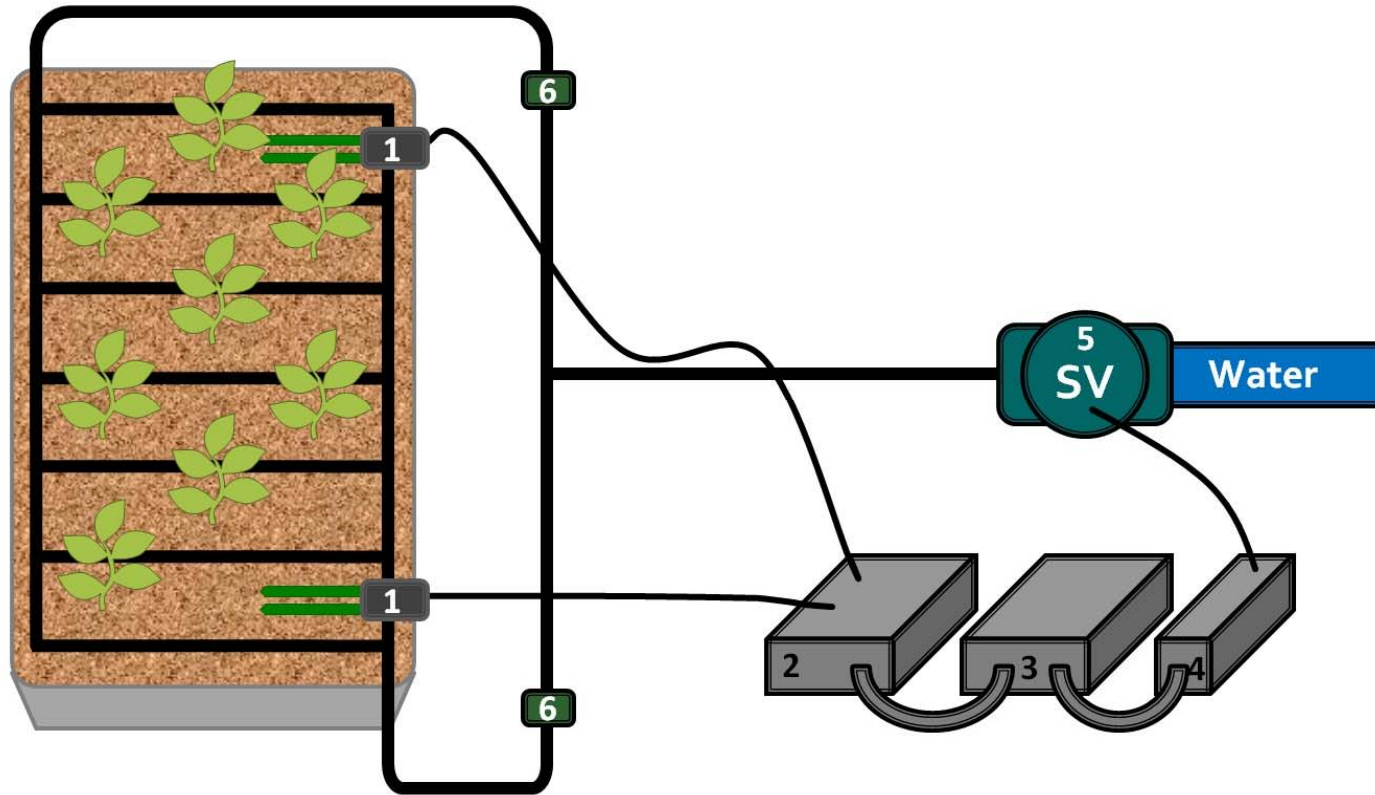

Supplemental Figure S1. Schematic diagram of the soil moisture sensor-based irrigation system. 1) capacitance soil moisture sensor, 2) multiplexer, 3) datalogger, 4) relay driver, 5) solenoid valve, 6) pressure compensated emitter. Only one tray is shown in detail although 16 trays were irrigated with the same system.

Supplemental Table S1. List of genes and sequence of the primers used for qRT-PCR

| Gene source                                                                                                                             | Annotation                    | Forward primers 5' 3'        | Reverse primers 5' 3'        |
|-----------------------------------------------------------------------------------------------------------------------------------------|-------------------------------|------------------------------|------------------------------|
| > NCED1 Tomato gi 2769641 emb Z97215.1  <i>Lycopersicon esculentum</i> mRNA for nine- <i>cis</i> -epoxycarotenoid dioxygenase           |                               |                              |                              |
| PETIN084121                                                                                                                             | <i>NCED1</i>                  | TGGAGGCTACTGTTGAGCTTCCTT     | ACCTACAAGCTTCAAGCTTGTTTT     |
| PETIN041019                                                                                                                             | <i>NCED2</i>                  | GGCTTCAGTGAACTTCCATCAAGAGTCC | GGGACGTATTTCTAAACCATCCCTCTGG |
| >gi 145329960 ref NM_001084497.1  <i>Arabidopsis thaliana</i> AAO3 (Abscisic ALDEHYDE OXIDASE 3)                                        |                               |                              |                              |
| PETAX039740                                                                                                                             | <i>AAO31</i>                  | ACCACTACTTCTGGCAGCTTCAGT     | AATCCAGGCCACAGAGTGTCTTCA     |
| PETIN023342                                                                                                                             | <i>AAO32</i>                  | GTGCAACAAGAGCTGCGATTAAAGC    | TCTCCACATAATCCAGGCCACACT     |
| > CYP707A1_Tomato gi 160369825 gb EU183406.1  <i>Solanum lycopersicum</i> ABA 8 <sup>l</sup> -hydroxylase (CYP707A1) mRNA, complete cds |                               |                              |                              |
| PETIN061494                                                                                                                             | <i>CYP707A1</i>               | CAGAGAAGCTGTTGAGGATGTTGAGT   | GGTCCCATTGCCAAATGGCATGAAT    |
| PETIN048226                                                                                                                             | <i>CYP707A2</i>               | TGCTTGTCCAGGAAACGAACTTGC     | AGTCCACCCACTGGAAGTGGAAAT     |
| >gi 6573118 gb AF201661.1  <i>Lycopersicon esculentum</i> phospholipase D alpha mRNA, partial cds                                       |                               |                              |                              |
| PETIN026822                                                                                                                             | <i>PLD<math>\alpha</math></i> | CCTTTATCCAGAGAGCTTGGAAATGC   | TTTCTGCTCCAGGTAGTTCAGTCACC   |
| >gi 92834401 dbj DD138887.1  Uses of zinc finger transcription factor ZPT2-3 for improving desiccation-resistance of plants             |                               |                              |                              |
|                                                                                                                                         | <i>ZPT2-3</i>                 | TGTCAGCATGGGAGGAGATGAACA     | TACCACCGTCATAGTGGCACCTTT     |
| > Reference genes                                                                                                                       |                               |                              |                              |
| SGN-U207468                                                                                                                             | <i>EF1<math>\alpha</math></i> | CCTGGTCAAATTGGAAACGG         | CAGATCGCCTGTCAATCTTGG        |
| SGN-U207595                                                                                                                             | <i>CYP</i>                    | AGGCTCATCATTCCACCGTGT        | TCATCTGCGAACTTAGCACCG        |

Table S2. Morphological and physiological changes of *Petunia × hybrida* ‘Apple Blossom’ in response to various substrate water contents at 16 d after the start of the drying treatment. Leaf relative water content (RWC) was calculated as (fresh weight – dry weight) / (turgid weight – dry weight) × 100%. CO<sub>2</sub>-saturated assimilation rates ( $A_{max}$ ) were calculated using empirical A/Ci curve analysis (Photosyn Assistant; Dundee Scientific). Mean separation was done by Fisher’s protected LSD at  $\alpha=0.05$  (n=4).

| Substrate water content (m <sup>3</sup> ·m <sup>-3</sup> ) | Leaf size (cm <sup>2</sup> ) | Shoot dry weight (g) | Leaf RWC (%) | $A_{max}$ (μmol·m <sup>-2</sup> ·s <sup>-1</sup> ) |
|------------------------------------------------------------|------------------------------|----------------------|--------------|----------------------------------------------------|
| 0.1                                                        | 6.62 c                       | 2.00 b               | 72.8 b       | 31.30 c                                            |
| 0.2                                                        | 9.31 b                       | 4.06 ab              | 87.8 a       | 36.65 bc                                           |
| 0.3                                                        | 10.71 b                      | 3.82 ab              | 88.3 a       | 41.96 ab                                           |
| 0.4                                                        | 13.35 a                      | 5.58 a               | 89.3 a       | 44.66 a                                            |
